# Supplementary material
Source: PubMed Central journal article supplement (PMC3186374)
Supplement: supp_M111.253641_jbc.M111.253641-1.pdf [file supp_M111.253641_jbc.M111.253641-1.pdf]

**Supplementary Table 1** Data collection, phasing and refinement statistics

|                                   | SAM complex              | sinefungin complex       |
|-----------------------------------|--------------------------|--------------------------|
| <b>Data collection</b>            |                          |                          |
| Cell dimensions (Å)               | 54.4, 140.9, 119.0       | 54.6, 141.0, 118.8       |
| Wavelength (Å)                    | 1                        | 1                        |
| Resolution (Å)                    | 30.0–2.50<br>(2.59–2.50) | 50.0–2.17<br>(2.25–2.17) |
| $R_{\text{sym}}$                  | 0.092 (0.426)            | 0.051 (0.352)            |
| Mean $I/\sigma$                   | 15.6 (2.6)               | 34.0 (3.4)               |
| Completeness (%)                  | 99.8 (99.3)              | 99.9 (99.8)              |
| Redundancy                        | 6.9 (5.5)                | 7.1 (5.9)                |
| <b>Refinement</b>                 |                          |                          |
| Resolution (Å)                    | 30-2.50                  | 50-2.17                  |
| No. reflections                   | 16387                    | 24710                    |
| $R_{\text{work}}/R_{\text{free}}$ | 0.185/0.225              | 0.186/0.219              |
| Number of atoms                   |                          |                          |
| Protein/ligand/ion/water          | 3170/27/21/53            | 3163/27/26/94            |
| Average $B$ -factors              |                          |                          |
| Protein/ligand/ion/water          | 44.2/43.7/65.9/38.5      | 46.0/37.9/72.6/46.0      |
| Ramachandran favored/allowed (%)  | 98.2/1.8                 | 97.9/2.1                 |
| Rmsd bond length (Å)/angles (°)   | 0.002/0.560              | 0.005/0.866              |
| PDB ID                            | 3AXT                     | 3AXS                     |

\*Values in parentheses are for highest-resolution shell.
