# Supplementary material
Source: PubMed Central journal article supplement (PMC3186374)

# Supplementary Fig. 1

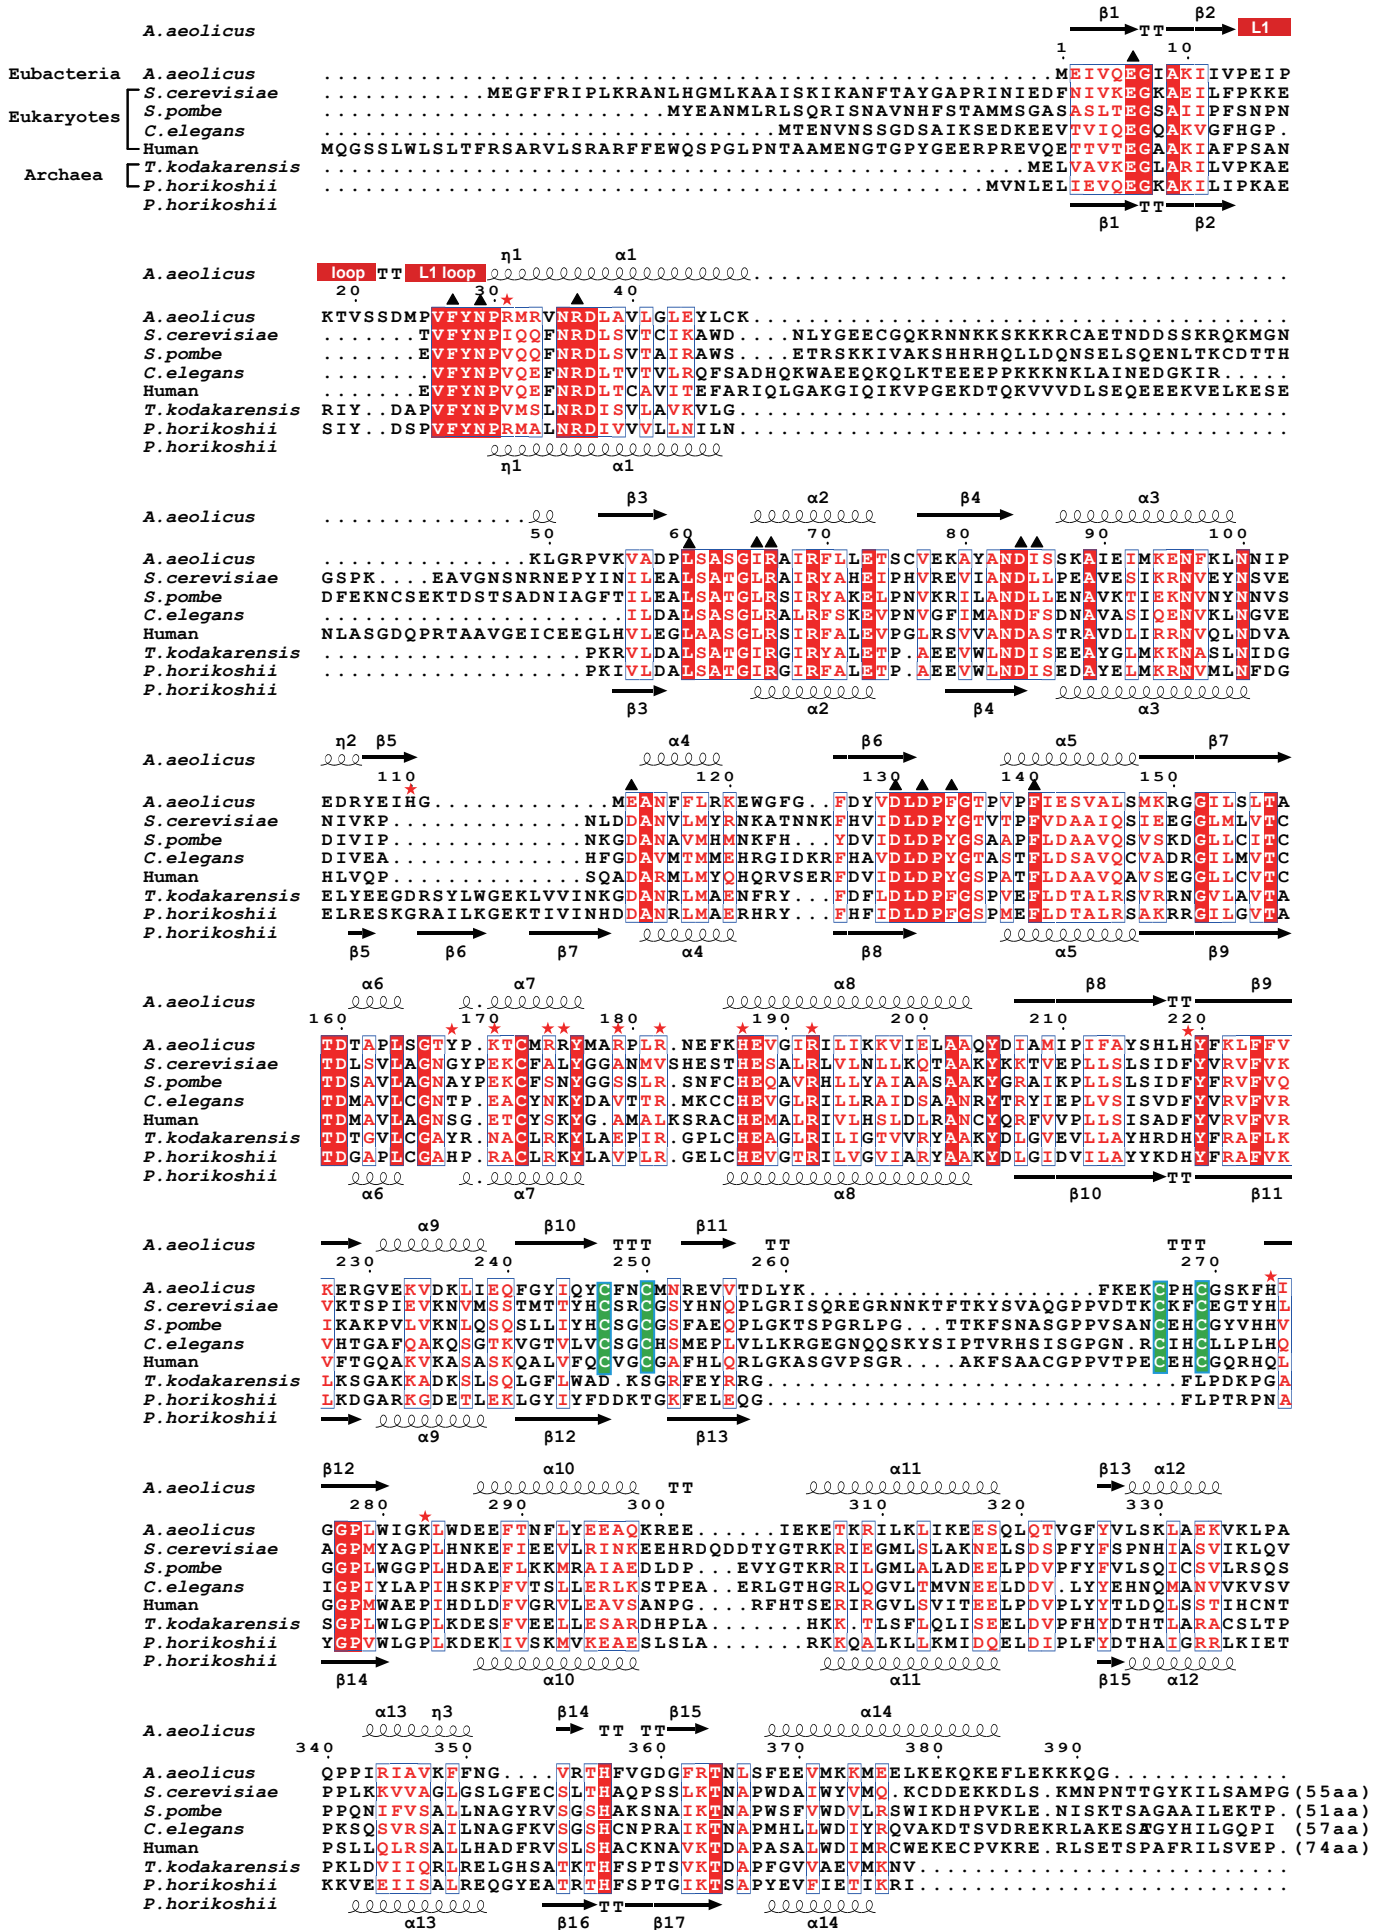

Supplement: supp_M111.253641_jbc.M111.253641-2.pdf [file supp_M111.253641_jbc.M111.253641-2.pdf]

# Supplementary Fig. 2

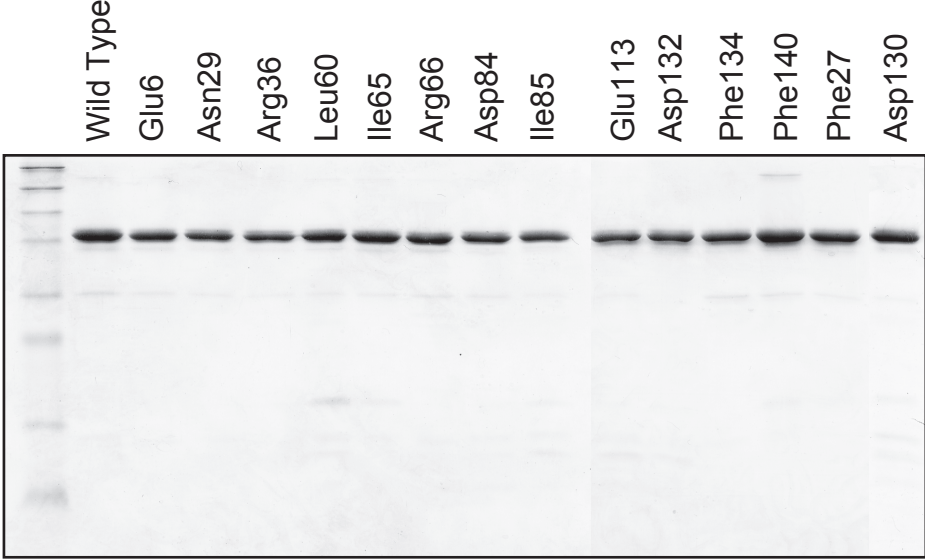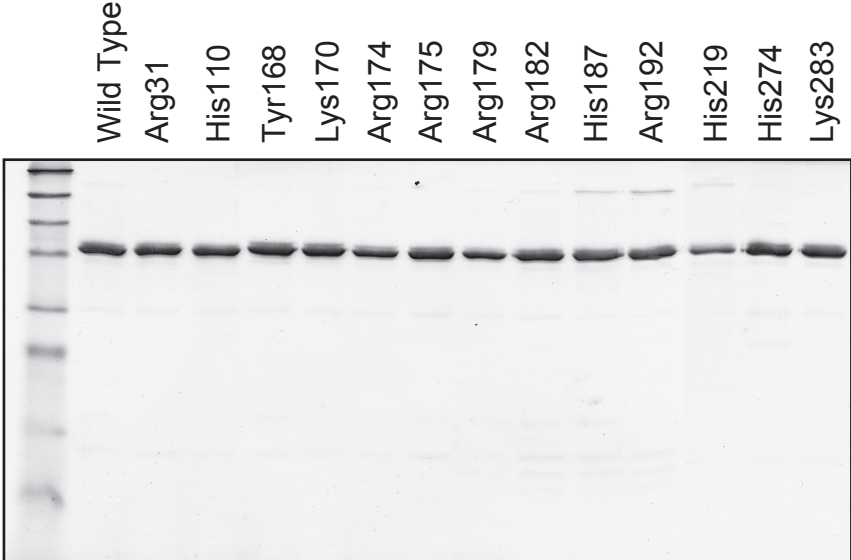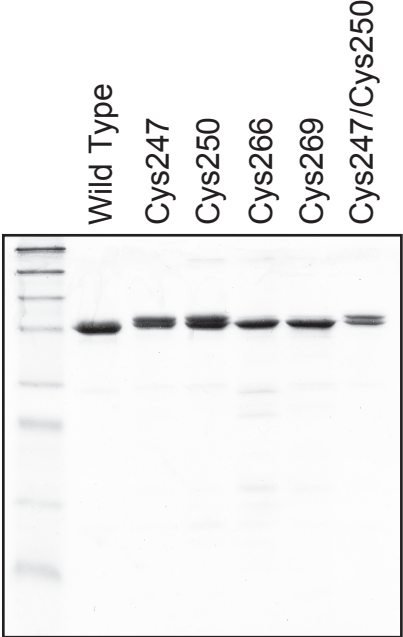

Supplement: supp_M111.253641_jbc.M111.253641-3.pdf [file supp_M111.253641_jbc.M111.253641-3.pdf]
